# Supplementary material
Source: PubMed Central journal article supplement (PMC5388176)
Supplement: NIHMS71361-supplement-Supplementary_Data.pdf [file NIHMS71361-supplement-Supplementary_Data.pdf]

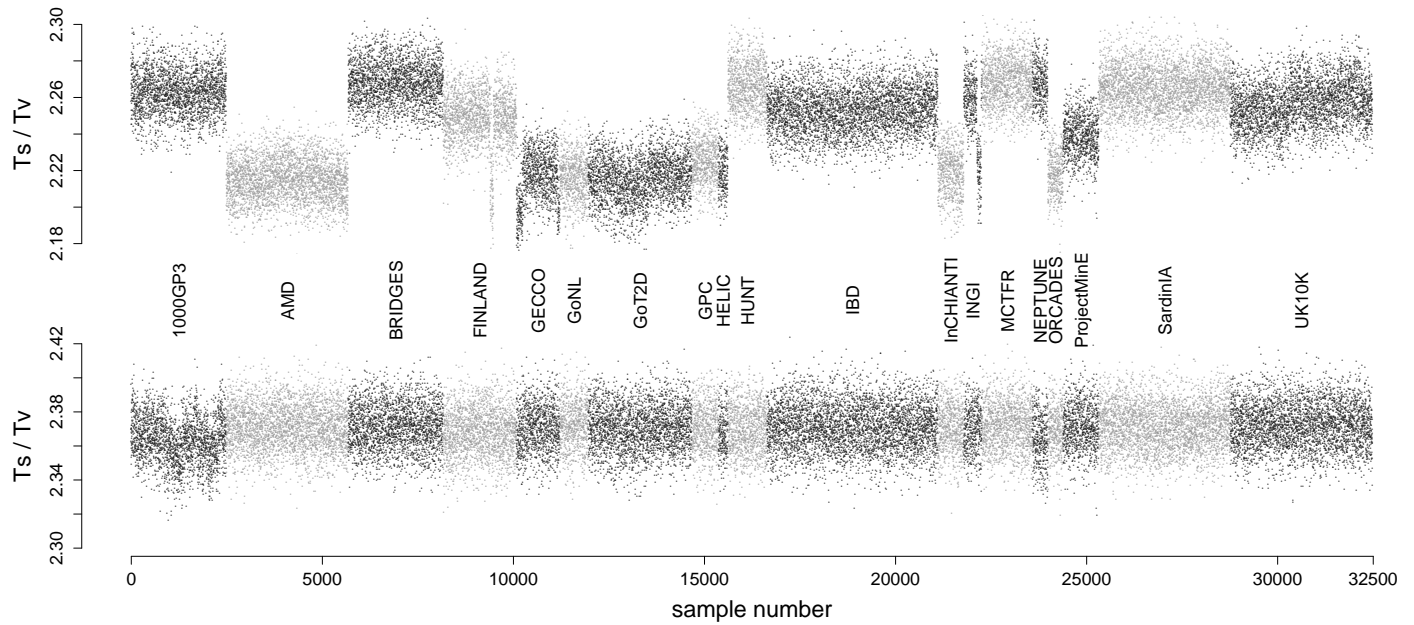

### Supplementary Figure 1

The effect of sites filtering on Ts/Tv ratio per sample

The top figure shows the per-sample transition-transversion ratio ( $Ts/Tv$ ) for chromosome 20 after running the GLPhase genotype calling method on the full MAC5 site list. In the bottom figure, GLPhase was run after the site filtering described in the text.

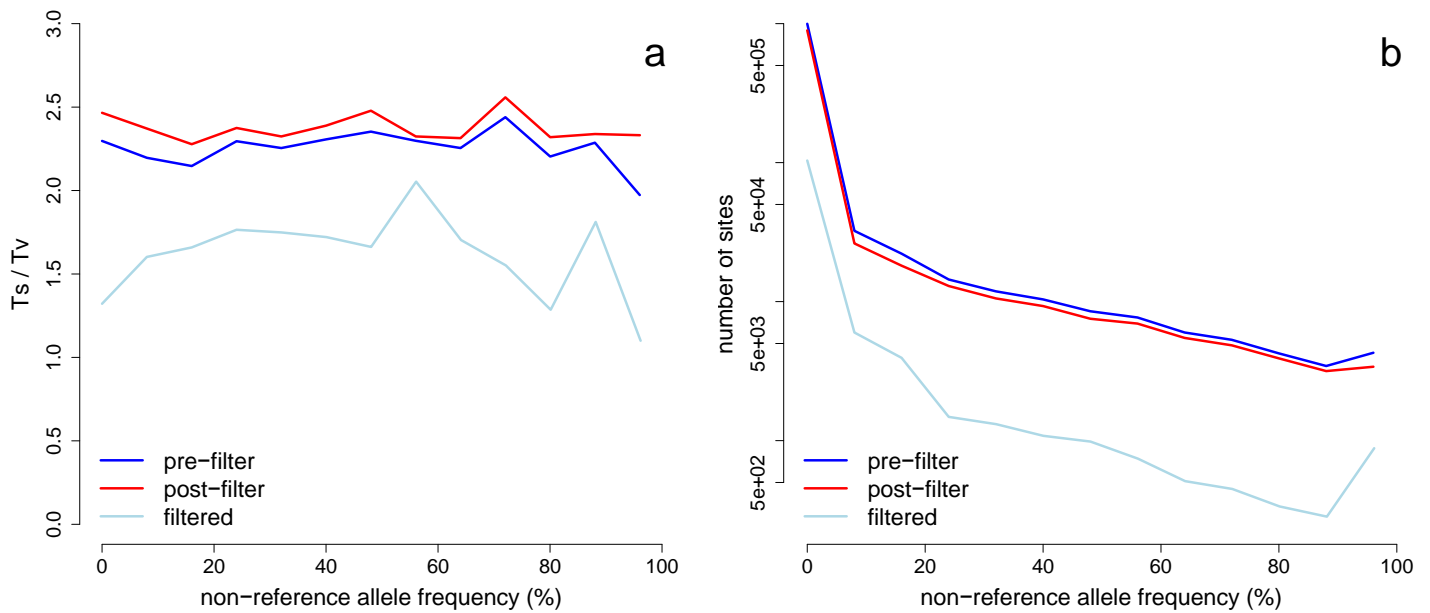

## Supplementary Figure 2

Data summaries before and after site filtering

Figure a shows the number of sites in the unfiltered and filtered MAC5 site lists (chromosome 20) stratified by non-reference allele frequency. The allele frequency here is calculated from the genotypes made after running the GLPhase genotype calling method on the full MAC5 site list. Figure b shows the corresponding transition-transversion ratio ( $T_s/T_v$ ) of these sites.

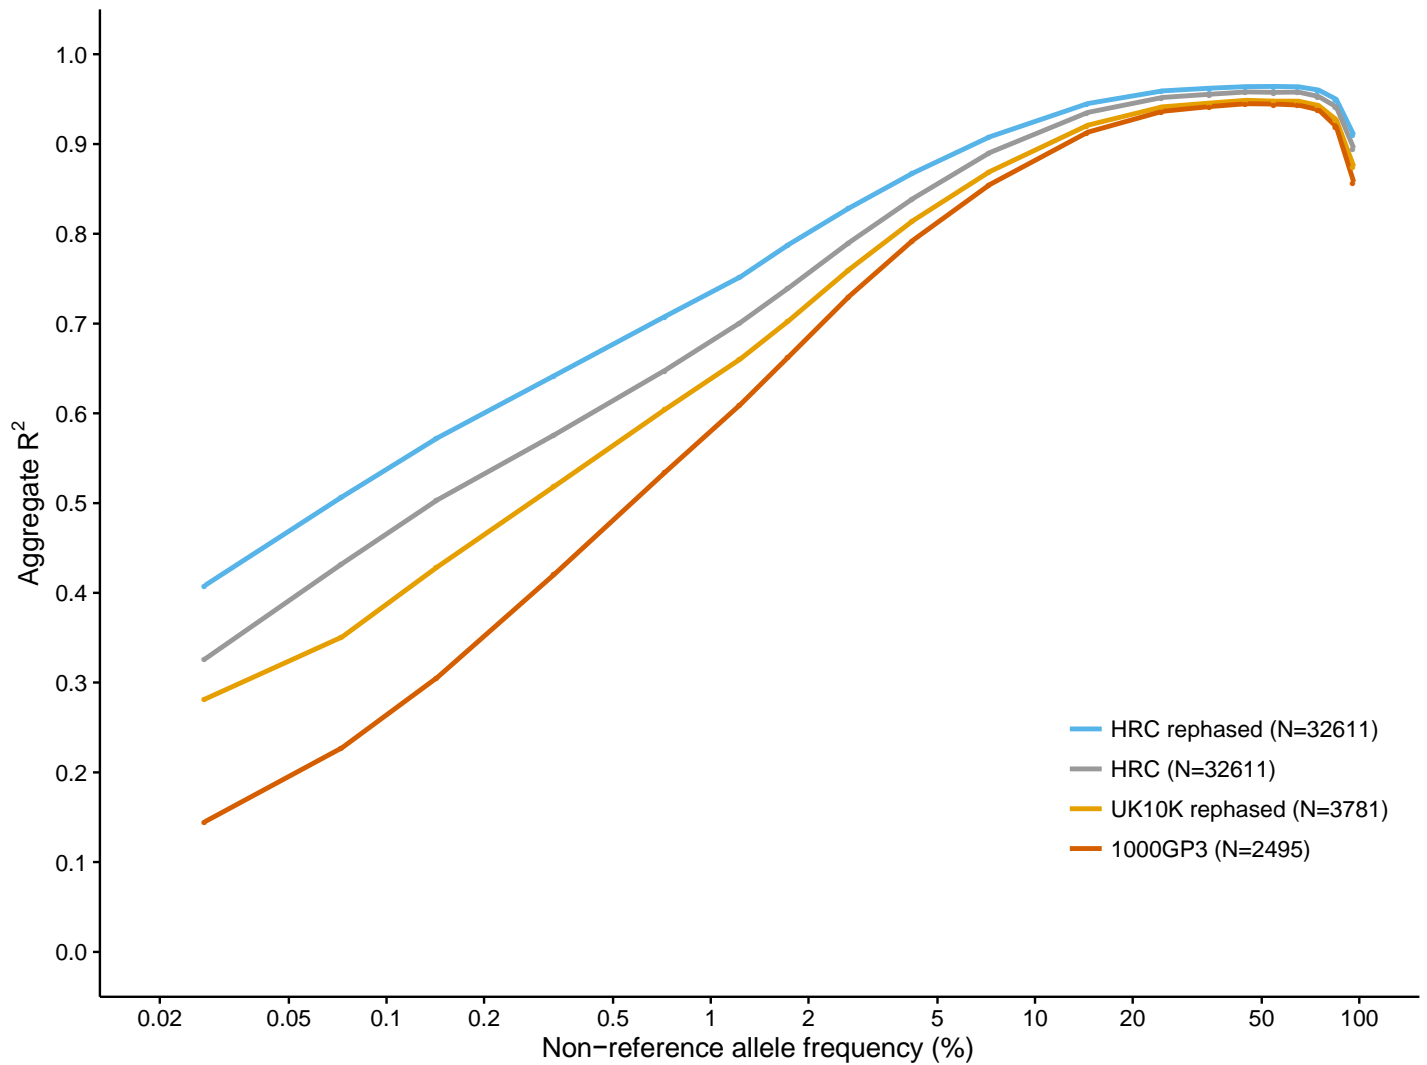

**Supplementary Figure 3**

**Performance of imputation using different reference panels**

The x-axis shows the non-reference allele frequency of the SNP being imputed on a log scale. The y-axis shows imputation accuracy measured by aggregate  $r^2$  when imputing SNP genotypes into 10 CEU samples. These results are based on using genotypes from sites on Illumina Core Exome SNP array.

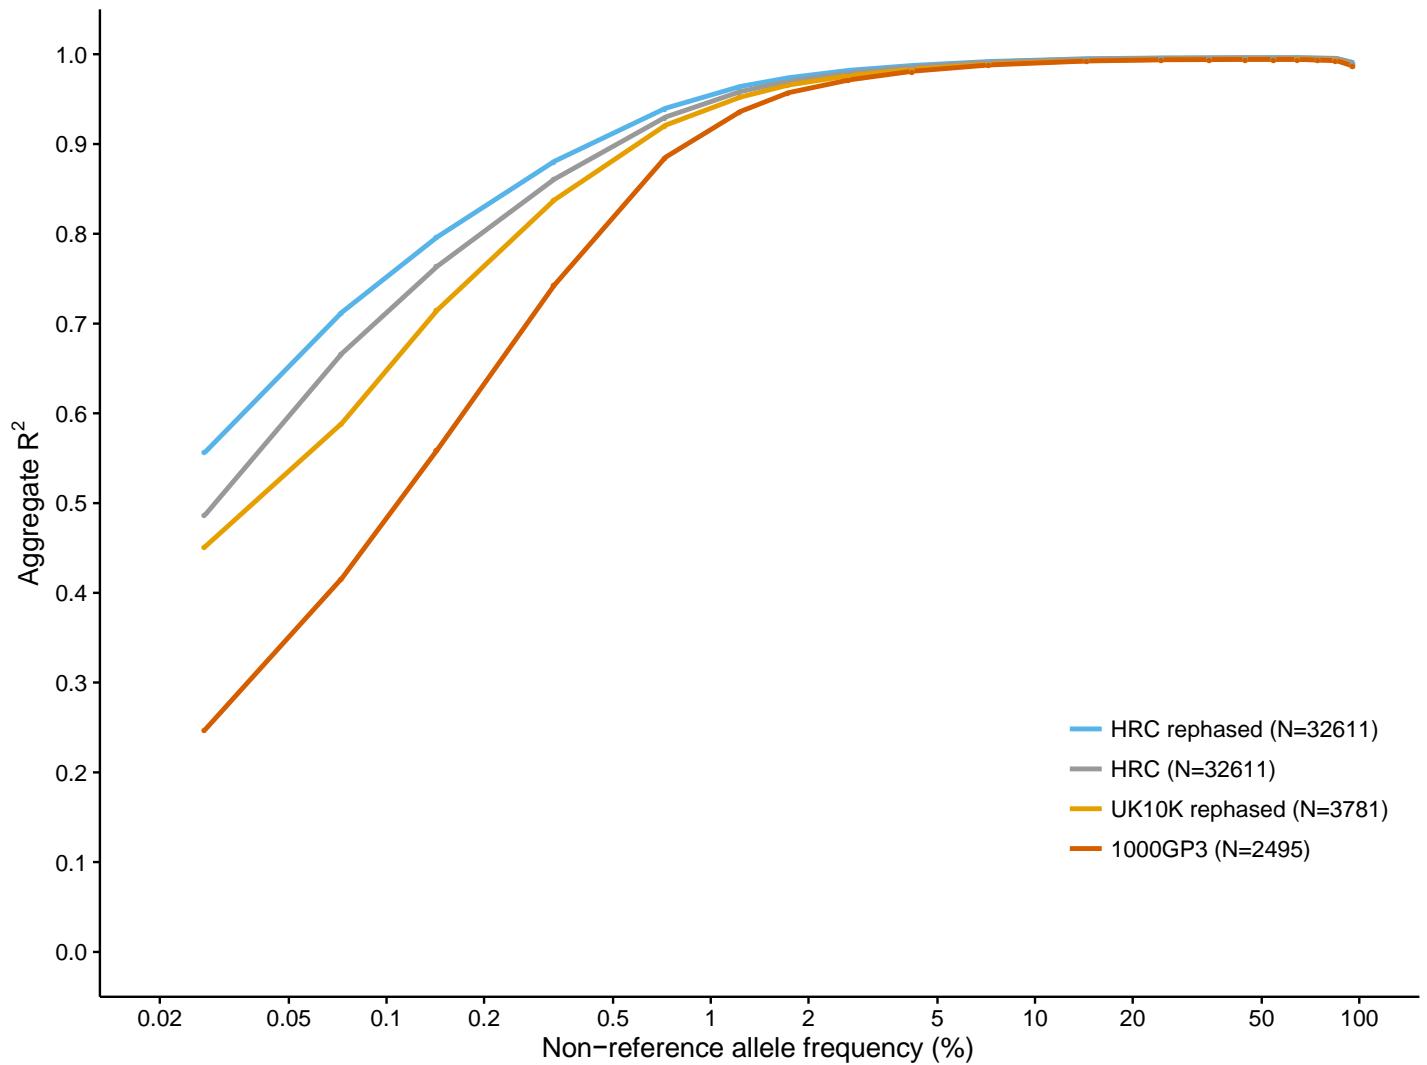

**Supplementary Figure 4**

**Performance of imputation using different reference panel.**

The x-axis shows the non-reference allele frequency of the SNP being imputed on a log scale. The y-axis shows imputation accuracy measured by aggregate  $r^2$  when imputing SNP genotypes into 10 CEU samples. These results are based on using genotypes from sites on Illumina OMNI 5M SNP array.

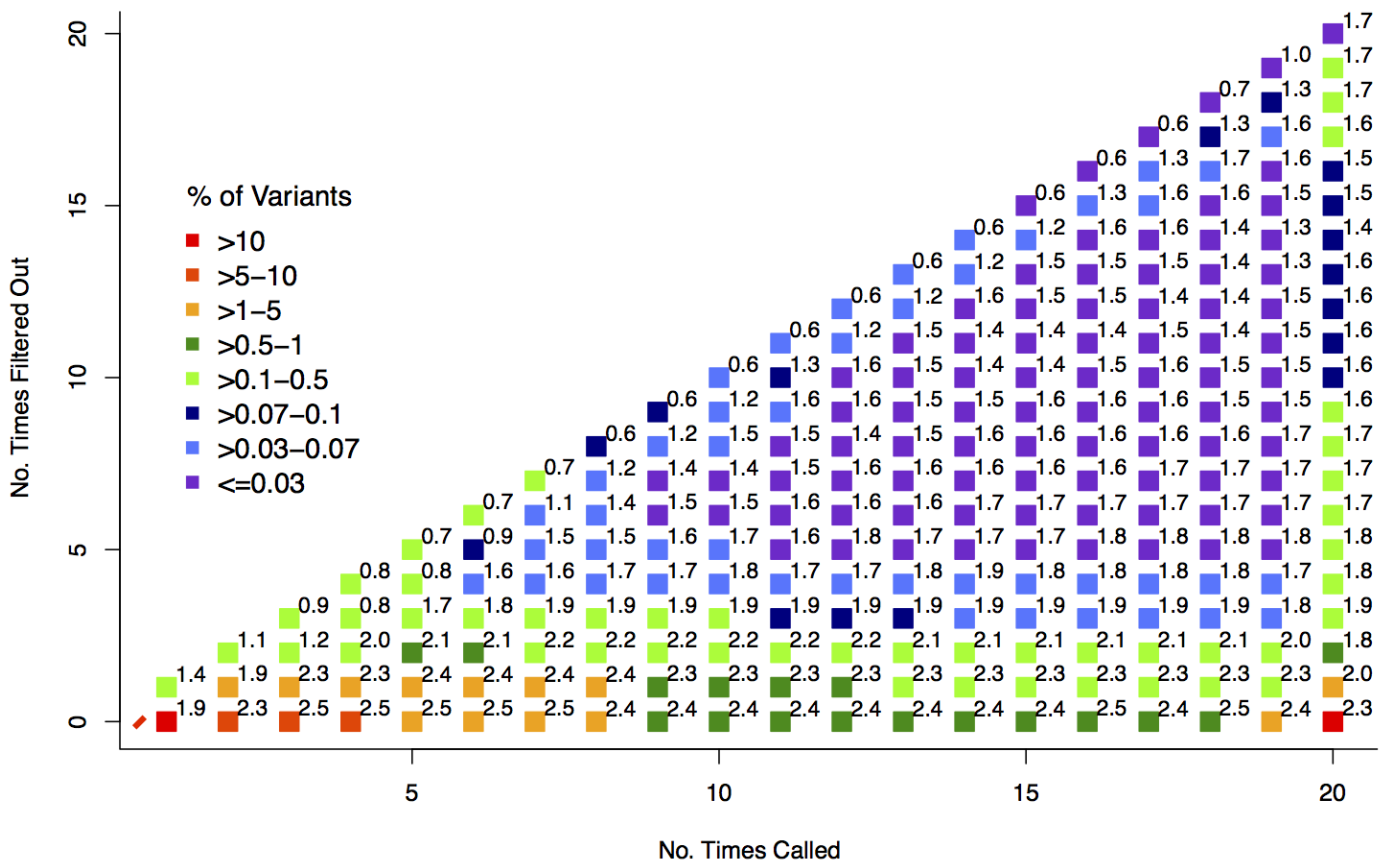

**Supplementary Figure 5**

**Site stratification by calling and filtering status across cohorts.**

On the x-axis we show the number of studies a variant was called in (out of 20) and on the y-axis we show the number of times it was filtered out by the cohort-specific internal QC pipelines. The color shows the percentage of variants in each such cell (red means more than 10% of variants lie in that cell while blue means less than 0.1%). The number to the top right of each cell denotes the  $T_s/T_v$  ratio for all sites in that cell. Cells higher in the plot have been filtered out relatively often and usually represent poor variants, as is also seen from the low  $T_s/T_v$  ratio. All variants above the red line were filtered out (which excludes all cells which had been filtered independently by more than 4 studies or have  $T_s/T_v$  ratio less than 1.7)

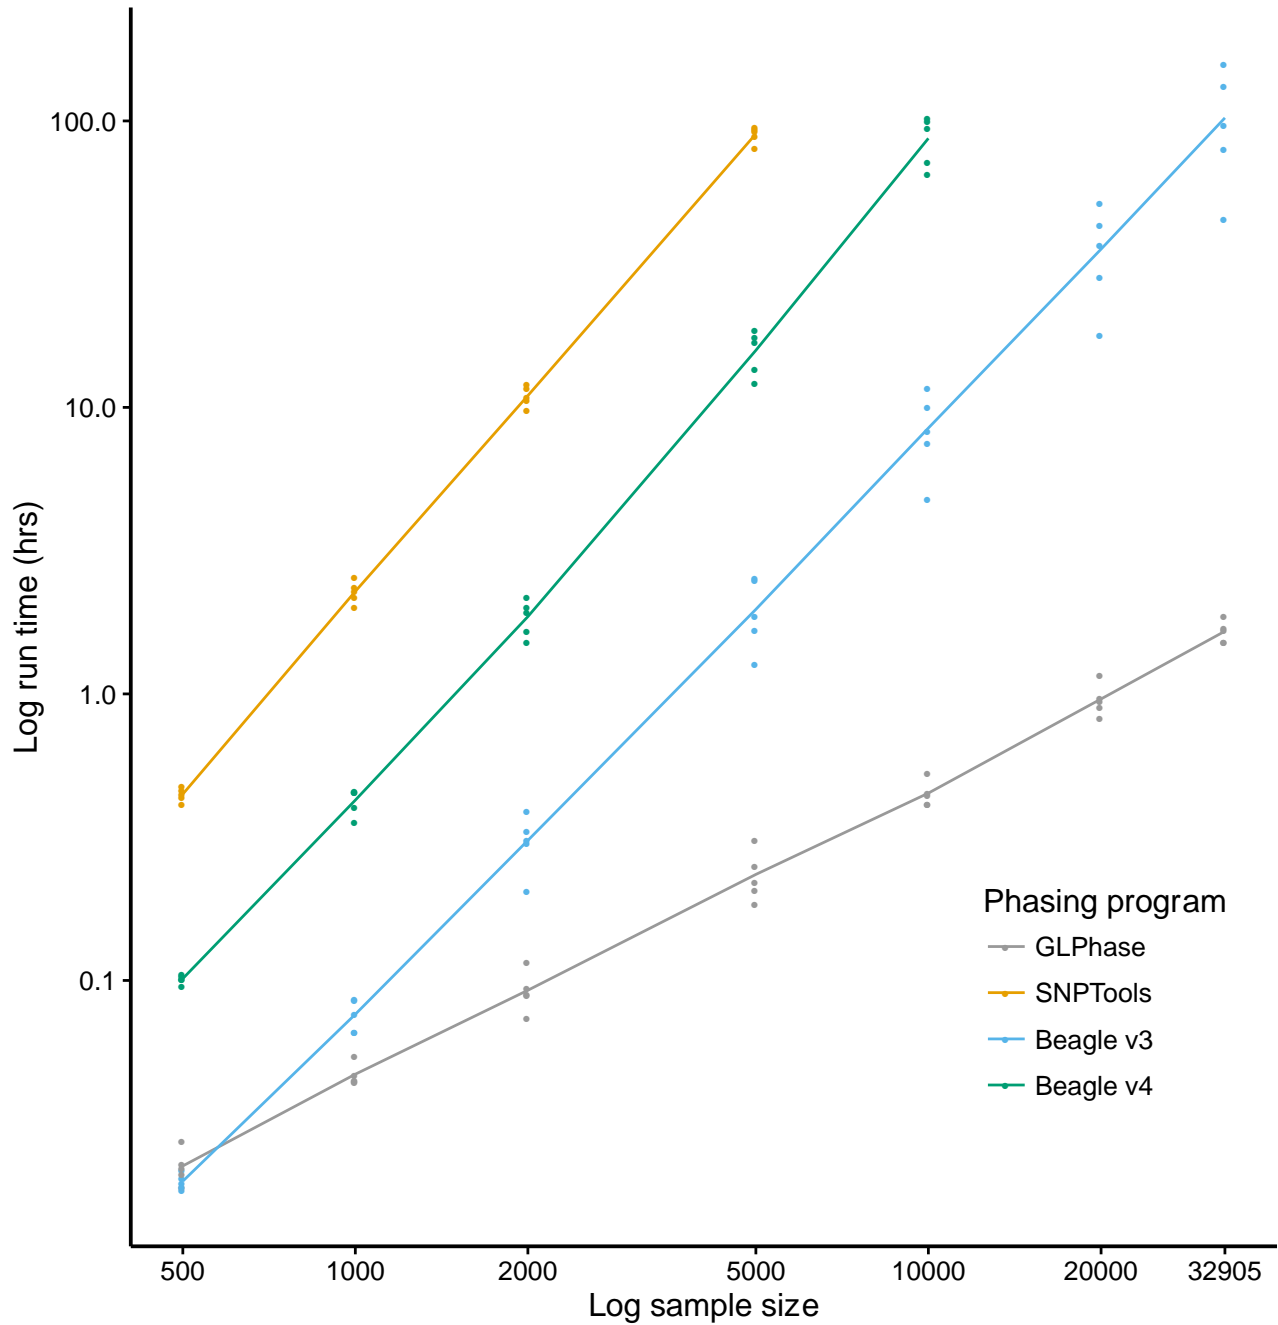

**Supplementary Figure 6**

**Comparison of methods for genotype calling as sample size increases**

The figure shows a log-log plot of run time vs sample size for four different methods of genotype calling from GL data. For each sample size 5 random 1024 site chunks from chromosome 20 were used. Each dot represents the run time of a single dataset. Lines are drawn between successive means of run times for each value of sample size

## Supplementary Tables

| Cohort   | # samples in Release 1 | Depth   | Website                                                                           | Reference for cohort (where available)                                                                                                                                                                          |
|----------|------------------------|---------|-----------------------------------------------------------------------------------|-----------------------------------------------------------------------------------------------------------------------------------------------------------------------------------------------------------------|
| UK10K    | 3715                   | 6.5x    | <a href="http://www.uk10k.org/">http://www.uk10k.org/</a>                         | UK10K Consortium et al. The UK10K project identifies rare variants in health and disease. Nature (2015). doi:10.1038/nature14962                                                                                |
| SardinIA | 3445                   | 4x      | <a href="https://sardinia.irp.nia.nih.gov/">https://sardinia.irp.nia.nih.gov/</a> | Sidore et al. Genome sequencing elucidates Sardinian genetic architecture and augments association analyses for lipid and blood inflammatory markers. Nat Genet. 2015 Nov;47(11):1272-81. doi: 10.1038/ng.3368. |
| IBD      | 4474                   | 4x + 2x | <a href="http://www.ibdresearch.co.uk/">http://www.ibdresearch.co.uk/</a>         | Barrett, J. C. et al. Genome-wide association defines more than 30 distinct susceptibility loci for Crohn's disease. Nat.                                                                                       |

|                                |      |            |                                                                                                                                 |                                                                                                                                                                                             |
|--------------------------------|------|------------|---------------------------------------------------------------------------------------------------------------------------------|---------------------------------------------------------------------------------------------------------------------------------------------------------------------------------------------|
|                                |      |            |                                                                                                                                 | Genet. 40, 955–962 (2008). Parkes et al. Sequence variants in the autophagy gene IRGM and multiple other replicating loci contribute to Crohn's disease susceptibility. 39, 830–832 (2007). |
| GoT2D                          | 2709 | 4x/Exome   | <a href="http://www.type2diabetesgenetics.org/informational/got2d">http://www.type2diabetesgenetics.org/informational/got2d</a> | Flannick, J. Whole-genome sequencing of 2,657 individuals and the genetic architecture of type 2 diabetes. <i>Nature</i> (in press)                                                         |
| BRIDGES                        | 2487 | 6-8x (12x) |                                                                                                                                 | n/a                                                                                                                                                                                         |
| 1000 Genomes Phase 3 (1000GP3) | 2495 | 4x/Exome   | <a href="http://www.1000genomes.org/">http://www.1000genomes.org/</a>                                                           | 1000 Genomes Project Consortium et al. A global reference for human genetic variation. <i>Nature</i> 526, 68–74 (2015).                                                                     |
| GoNL                           | 748  | 12x        | <a href="http://www.nlgenome.nl/">http://www.nlgenome.nl/</a>                                                                   | Genome of the Netherlands Consortium. Whole-genome sequence variation, population structure and demographic history of the Dutch population.                                                |



|                                |      |       |                                                                     |                                                                                                                                                                                                                                                                                                       |
|--------------------------------|------|-------|---------------------------------------------------------------------|-------------------------------------------------------------------------------------------------------------------------------------------------------------------------------------------------------------------------------------------------------------------------------------------------------|
|                                |      |       |                                                                     | Nat. Genet. 46, 818–825 (2014).                                                                                                                                                                                                                                                                       |
| AMD                            | 3189 | 4x    |                                                                     | Chen W et al. Genetic variants near TIMP3 and high-density lipoprotein-associated loci influence susceptibility to age-related macular degeneration. Proc Natl Acad Sci USA. 107:7401-7406, 2010. PMID: 20385819                                                                                      |
| HUNT                           | 1023 | 4x    |                                                                     | Krokstad et al. Cohort Profile: the HUNT Study, Norway. Int J Epidemiol. 2013 Aug;42(4):968-77                                                                                                                                                                                                        |
| SiSu +<br>Kuusamo<br>(FINLAND) | 1918 | 4x    | <a href="http://www.sisuproject.fi/">http://www.sisuproject.fi/</a> | Vartiainen, E. et al. Thirty-five-year trends in cardiovascular risk factors in Finland. Int. J. Epidemiol. 39, 504-518 (2010). Pajunen, P. et al. The metabolic syndrome as a predictor of incident diabetes and cardiovascular events in the Health 2000 Study. Diabetes Metab. 36, 395-401 (2010). |
| INGI-FVG                       | 250  | 4-10x | <a href="http://www.netg">http://www.netg</a>                       | Esko,T. et al. Genetic                                                                                                                                                                                                                                                                                |

|         |      |            |                                                                                       |                                                                                                                                                                                                         |
|---------|------|------------|---------------------------------------------------------------------------------------|---------------------------------------------------------------------------------------------------------------------------------------------------------------------------------------------------------|
|         |      |            | <a href="http://ene.it/ita/ingi.asp">ene.it/ita/ingi.asp</a>                          | characterization of northeastern Italian population isolates in the context of broader European genetic diversity. Eur J Hum Genet. 2013 Jun;21(6):659-65. doi: 10.1038/ejhg.2012.229. Epub 2012 Dec 19 |
| INGI-VB | 225  | 6x         | <a href="http://www.netg.ene.it/ita/ingi.asp">http://www.netg.ene.it/ita/ingi.asp</a> | Colonna V, et al. Small effective population size and genetic homogeneity in the Val Borbera isolate. Eur J Hum Genet. 2013 Jan;21(1):89-94.                                                            |
| MCTFR   | 1325 | 10x        | <a href="https://mctfr.psych.umn.edu/">https://mctfr.psych.umn.edu/</a>               | Vrieze, S. I. et al. In search of rare variants: preliminary results from whole genome sequencing of 1,325 individuals with psychophysiological endophenotypes. Psychophysiology 51, 1309–1320 (2014).  |
| HELIC   | 247  | 4x<br>(1x) | <a href="http://www.helic.org/">http://www.helic.org/</a>                             | Panoutsopoulou K, et al. Genetic characterization of Greek population                                                                                                                                   |

|           |      |      |                                                                                                                                                                               |                                                                                                                                                                                                                                   |
|-----------|------|------|-------------------------------------------------------------------------------------------------------------------------------------------------------------------------------|-----------------------------------------------------------------------------------------------------------------------------------------------------------------------------------------------------------------------------------|
|           |      |      |                                                                                                                                                                               | isolates reveals strong genetic drift at missense and trait-associated variants. Nat Commun. 2014 Nov 6;5:5345. doi: 10.1038/ncomms6345.                                                                                          |
| ORCADES   | 398  | 4x   | <a href="http://www.orca-des.ed.ac.uk/orca-des/">http://www.orca-des.ed.ac.uk/orca-des/</a>                                                                                   | McQuillan, R., et al. (2008). Runs of homozygosity in European populations. American Journal of Human Genetics, 83(3), 359–372. <a href="http://doi.org/10.1016/j.ajhg.2008.08.007">http://doi.org/10.1016/j.ajhg.2008.08.007</a> |
| InCHIANTI | 676  | 7x   | <a href="http://www.inchi-antistudy.net/bin/dex.html">http://www.inchi-antistudy.net/bin/dex.html</a>                                                                         | Ferrucci L, et al. (2000) Subsystems contributing to the decline in ability to walk: bridging the gap between epidemiology and geriatric practice in the InCHIANTI study. J Am Geriatr Soc 48: 1618–1625.                         |
| GECCO     | 1130 | 4-6x | <a href="https://www.fhcr.org/en/labs/phs/projects/cancer-prevention/projects/gecco.html">https://www.fhcr.org/en/labs/phs/projects/cancer-prevention/projects/gecco.html</a> | Hays J et al. The Women's Health Initiative recruitment methods and results. Ann Epidemiol                                                                                                                                        |

|               |              |     |                                                                           |                                                                                                                                                                                  |
|---------------|--------------|-----|---------------------------------------------------------------------------|----------------------------------------------------------------------------------------------------------------------------------------------------------------------------------|
|               |              |     |                                                                           | 2003;13:S18- S77. The Women's Health Initiative Study Group. Design of the Women's Health Initiative clinical trial and observational study. Control Clin Trials 1998;19:61-109. |
| GPC           | 697          | 30x |                                                                           | Pato et al. The genomic psychiatry cohort: partners in discovery. Am J Med Genet B Neuropsychiatr Genet. 2013 Jun;162B(4):306-12.                                                |
| ProjectMinE   | 935          | 45x | <a href="http://projectminE.com">http://projectminE.com</a>               | n/a                                                                                                                                                                              |
| NEPTUNE       | 402          | 4x  | <a href="http://www.neptune-study.org/">http://www.neptune-study.org/</a> | Design of the Nephrotic Syndrome Study Network (NEPTUNE) to evaluate primary glomerular nephropathy by a multidisciplinary approach. (2013). Kidney Int, 83(4), 749–756.         |
| <b>Totals</b> | <b>32488</b> |     |                                                                           |                                                                                                                                                                                  |

**Supplementary Table 1** : Table detailing studies that contributed datasets to the HRC. Details of study size, sequencing depth, webpages of studies and primary references are given.

| Sites                              | Samples                     | REF/REF | REF/ALT | ALT/ALT | NRD  |
|------------------------------------|-----------------------------|---------|---------|---------|------|
| <b>1000GP3</b>                     | <b>1000GP3 (N=2,525)</b>    | 0.10    | 0.61    | 0.43    | 0.70 |
|                                    | <b>HRC Pilot (N=13,309)</b> | 0.07    | 0.36    | 0.27    | 0.43 |
|                                    | <b>HRC full (N=32,905)</b>  | 0.06    | 0.34    | 0.25    | 0.41 |
| <b>HRC MAC5</b>                    | <b>1000GP3 (N=2,525)</b>    | 0.10    | 0.59    | 0.40    | 0.67 |
|                                    | <b>HRC Pilot (N=13,309)</b> | 0.06    | 0.38    | 0.26    | 0.43 |
|                                    | <b>HRC full (N=32,905)</b>  | 0.06    | 0.36    | 0.24    | 0.41 |
| <b>HRC MAC5 +<br/>site filters</b> | <b>1000GP3 (N=2,525)</b>    | 0.10    | 0.59    | 0.40    | 0.67 |
|                                    | <b>HRC Pilot (N=13,309)</b> | 0.06    | 0.36    | 0.25    | 0.42 |
|                                    | <b>HRC full (N=32,905)</b>  | 0.06    | 0.34    | 0.23    | 0.39 |

**Supplementary Table 2: Evaluation of genotype calling process.** The table reports percentage discordance of genotypes called using different sites lists (Sites column) and sample sets (Samples column). NRD = non reference allele discordance percentage.

| Imputation Panel                    | 0<=MAF<1% | 1%<=MAF<5% | 5%<=MAF   | Total      |
|-------------------------------------|-----------|------------|-----------|------------|
| 1000GP3                             | 3,488,324 | 1,930,001  | 5,309,997 | 10,728,322 |
| HRC v1                              | 7,833,143 | 2,243,365  | 5,425,008 | 15,501,516 |
| HRC v1<br>(only SNPs in<br>1000GP3) | 5,734,139 | 2,231,559  | 5,399,097 | 13,364,795 |

**Supplementary Table 3 : Summary of imputed variants in the InCHIANTI study. The table shows the numbers of SNPs imputed with an imputation  $r^2 \geq 0.5$  in the 1,210 samples from the InCHIANTI study using the 1000 Genomes Phase 3 panel (1000GP3) and the HRC panel (HRC v1). The third row of the table shows results for the HRC v1 panel restricted to only those SNPs in the 1000GP3 panel.**

| Trait                   | SNP chr:bp<br>(build 37) | Nearest<br>Gene      | InCHIANTI<br>MAF | 1000G Imputation      |       | HRC imputation (full HRC panel) |      |                       | HRC imputation (no InCHIANTI samples) |      |                        |       |
|-------------------------|--------------------------|----------------------|------------------|-----------------------|-------|---------------------------------|------|-----------------------|---------------------------------------|------|------------------------|-------|
|                         |                          |                      |                  | P-value               | $r^2$ | Effect<br>Size (SD)             | SE   | P-value               | Effect Size<br>(SD)                   | SE   | P-value                | $r^2$ |
| Lactic<br>Dehydrogenase | 3:52551566               | <i>STAB1</i>         | 0.006            | $3 \times 10^{-05}$   | 0.74  | 2.37                            | 0.29 | $6 \times 10^{-16}$   | 2.28                                  | 0.28 | $2.83 \times 10^{-15}$ | 0.69  |
| Magnesium               | 17:9689132               | <i>DHR57C</i>        | 0.004            | *                     | 0.01  | 2.26                            | 0.38 | $4.5 \times 10^{-09}$ | *                                     | *    | *                      | 0.47  |
| Resistin                | 16:17685354              | <i>XYLT1</i>         | 0.009            | $1.2 \times 10^{-06}$ | 0.79  | 1.36                            | 0.24 | $1.9 \times 10^{-08}$ | 1.44                                  | 0.27 | $1.87 \times 10^{-07}$ | 0.76  |
| Free Thyroxine<br>(FT4) | 9:7092298                | <i>KDM4C</i>         | 0.002            | *                     | *     | 3.26                            | 0.58 | $2 \times 10^{-08}$   | *                                     | *    | *                      | 0.32  |
| Vitamin D               | 19:11599979              | <i>ZNF653</i>        | 0.013            | $1.4 \times 10^{-05}$ | 0.59  | 1.47                            | 0.19 | $2.8 \times 10^{-08}$ | 1.15                                  | 0.21 | $6.14 \times 10^{-08}$ | 0.84  |
| Retinol                 | 11:19870163              | <i>NAV2</i>          | 0.004            | *                     | *     | 1.79                            | 0.32 | $3 \times 10^{-08}$   | *                                     | *    | *                      | 0.00  |
|                         | 5:129871638              | <i>CHSY3</i>         | 0.002            | *                     | 0.41  | 2.8                             | 0.5  | $3.6 \times 10^{-08}$ | 2.64                                  | 0.48 | $4.40 \times 10^{-08}$ | 0.81  |
| $\beta$ -Globulins      | 15:100810864             | <i>ADAMT<br/>S17</i> | 0.005            | $2 \times 10^{-07}$   | 0.53  | 1.71                            | 0.31 | $3.6 \times 10^{-08}$ | 1.53                                  | 0.30 | $3.13 \times 10^{-07}$ | 0.72  |
| Potassium               | 11:102811514             | <i>MMP13</i>         | 0.006            | $1.2 \times 10^{-06}$ | 0.77  | 1.43                            | 0.26 | $3.7 \times 10^{-08}$ | 1.71                                  | 0.31 | $2.65 \times 10^{-08}$ | 0.77  |

**Supplementary Table 4 : Potentially novel associations in the InCHIANTI study found by imputing SNPs using HRC release 1. The table lists the trait being tested and summary information about the SNP and the association signal. Imputation was carried out using 2 versions of the HRC panel (with and without the InCHIANTI samples in HRC). Some SNPs were excluded from analysis (denoted by \*) due to not being present in panel or having low imputation quality ( $r^2 < 0.5$ )**

|                               | Trait                 | Lactic Dehydrogenase | Potassium    |
|-------------------------------|-----------------------|----------------------|--------------|
|                               | SNP chr:bp (build 37) | 3:52551566           | 11:102811514 |
|                               | Effect/Other Allele   | C/G                  | A/G          |
|                               | Nearest Gene          | <i>STAB1</i>         | <i>MMP13</i> |
| <u>InCHIANTI Discovery</u>    | BETA (SD)             | -2.366               | -1.434       |
|                               | SE                    | 0.289                | 0.259        |
|                               | P-value               | 6.17E-16             | 3.66E-08     |
|                               | EAF                   | 0.006                | 0.006        |
|                               | N                     | 1206                 | 1206         |
|                               | Imp. Quality          | 0.79                 | 0.94         |
| <u>SHIP Replication</u>       | BETA (SD)             | -1.389               | -0.549       |
|                               | SE                    | 0.315                | 0.200        |
|                               | P-value               | 1.14E-05             | 0.00619879   |
|                               | EAF                   | 0.003                | 0.003        |
|                               | N                     | 1750                 | 4052         |
|                               | Imp. Quality          | 0.699                | 0.781        |
| <u>SHIP TREND Replication</u> | BETA (SD)             | -2.762               | -0.613       |
|                               | SE                    | 0.400                | 0.379        |
|                               | P-value               | 9.07E-12             | 0.106128     |
|                               | EAF                   | 0.003                | 0.004        |
|                               | N                     | 984                  | 984          |
|                               | Imp. Quality          | 0.747                | 0.849        |
| <u>META-ANALYSIS</u>          | BETA (SD)             | -2.107               | -0.841       |
|                               | SE                    | 0.188                | 0.146        |
|                               | P-value               | 3.78E-29             | 8.77E-09     |
|                               | EAF                   | 0.004                | 0.004        |
|                               | N                     | 3940                 | 6242         |

**Supplementary Table 5 : Replication results for InCHIANTI GWAS for the 93 circulating blood marker phenotypes.** The table shows results for the 2 SNPs that replicated in either the SHIP or SHIP TREND samples. The final meta-analysis results across the 3 cohorts are reported.

| Imputation Panel | Effect size (SDs) | p-value             | Imputation quality |
|------------------|-------------------|---------------------|--------------------|
| HRC release 1    | -2.07             | $2 \times 10^{-13}$ | 0.98               |
| 1000GP3          | -1.86             | $3 \times 10^{-11}$ | 0.87               |
| HapMap2          | -                 | -                   | -                  |

**Supplementary Table 6 : Summary of association signal at SNP rs28929474 using imputed data from 3 different reference panels. The SNP does not exist in the HapMap2 panel.**

| Site List                            | Source/Type     |
|--------------------------------------|-----------------|
| Human CNV370-Quad                    | Chip (Illumina) |
| Human 660W-Quad                      | Chip (Illumina) |
| Human OmniExpress                    | Chip (Illumina) |
| Human Omni1-Quad                     | Chip (Illumina) |
| Human Omni5                          | Chip (Illumina) |
| Human CoreExome                      | Chip (Illumina) |
| MetaboChip                           | Chip (Illumina) |
| Affy_Genome-Wide Human SNP Nsp/Sty   | Chip (Affy)     |
| Affy Genome-Wide Human SNP Array 6.0 | Chip (Affy)     |
| UK Biobank                           | Biobank Study   |
| GIANT Consortium                     | GWAS Study      |
| Global Lipids Genetics Consortium    | GWAS Study      |

**Supplementary Table 7 : List of commercial genotyping arrays and study lists used to add SNPs back in after site filtering.**



| <b>Number of samples</b> | <b>Studies</b> |             | <b>Removal choice</b>                                                                               |
|--------------------------|----------------|-------------|-----------------------------------------------------------------------------------------------------|
| 5                        | AMD            | AMD         | Removed the duplicates randomly.                                                                    |
| 36                       | IBD            | IBD         | These were duplicates between Crohns and UC studies. Removed the duplicates randomly.               |
| 5                        | FINLAND        | FINLAND     | Removed lower coverage (4x) Kuusamo samples in preference to the higher coverage (6x) SiSu samples. |
| 14                       | GECCO          | GECCO       | Removed the duplicates randomly.                                                                    |
| 17                       | GoT2D          | FINLAND     | Removed the FINLAND samples.                                                                        |
| 79                       | GoT2D          | UK10K       | Removed the UK10K/UK10K duplicates, then removed randomly otherwise.                                |
| 34                       | GPC            | BRIDGES     | Removed the GPC samples.                                                                            |
| 32                       | GPC            | GPC         | Removed the duplicates randomly.                                                                    |
| 14                       | MCTFR          | MCTFR       | Removed the duplicates randomly.                                                                    |
| 1                        | NEPTUNE        | NEPTUNE     | Removed the duplicates randomly.                                                                    |
| 1                        | ORCADES        | 1000GP3     | Removed the ORCADES sample.                                                                         |
| 1                        | ProjectMinE    | GoNL        | Removed the ProjectMinE sample.                                                                     |
| 1                        | ProjectMinE    | ProjectMinE | Removed the duplicates randomly.                                                                    |
| 3                        | SardinIA       | SardinIA    | Removed the duplicates randomly.                                                                    |
| 26                       | UK10K          | UK10K       | These were monozygotic twins already                                                                |

|  |  |  |                                                                                                                        |
|--|--|--|------------------------------------------------------------------------------------------------------------------------|
|  |  |  | identified by UK10K. Removed based on a list from UK10K of samples they had already excluded from downstream analysis. |
|--|--|--|------------------------------------------------------------------------------------------------------------------------|

**Supplementary Table 8** : Details of duplicate removal. Each row of the table details the number of duplicate pairs found within and between studies together with the method by which duplicates were removed.

## Supplementary Note

The section contains acknowledgements for some of the cohorts

### NEPTUNE

The Nephrotic Syndrome Study Network Consortium (NEPTUNE); U54-DK-083912, is a part of the National Center for Advancing Translational Sciences (NCATS) Rare Disease Clinical Research Network (RDCRN), supported through a collaboration between the Office of Rare Diseases Research (ORDR), NCATS, and the National Institute of Diabetes, Digestive, and Kidney Diseases. RDCRN is an initiative of ORDR, NCATS. Additional funding and/or programmatic support for this project has also been provided by the University of Michigan, NephCure Kidney International, and the Halpin Foundation.

### GECCO

National Cancer Institute, National Institutes of Health, U.S. Department of Health and Human Services (U01 CA137088; R01 CA059045; U01 CA164930). HPFS is supported by the National Institutes of Health (P01 CA 055075, UM1 CA167552, R01 137178, R01 CA151993 and P50 CA127003). WHI: The WHI program is funded by the National Heart, Lung, and Blood Institute, National Institutes of Health, U.S. Department of Health and Human Services through contracts HHSN268201100046C, HHSN268201100001C, HHSN268201100002C, HHSN268201100003C, HHSN268201100004C, and HHSN271201100004C. The authors would like to thank all those at the GECCO Coordinating Center for helping bring together the data and people that made this project possible. We would like to acknowledge Patrice Soule and Hardeep Ranu of the Dana Farber Harvard Cancer Center High-Throughput Polymorphism Core who assisted in the genotyping for HPFS under the supervision of Dr. Immaculata Devivo and Dr. David Hunter, Qin (Carolyn) Guo and Lixue Zhu who assisted in programming for HPFS. We would like to thank the participants and staff of the Health Professionals Follow-Up Study, for their valuable contributions as well as the following state cancer registries for their help: AL, AZ, AR, CA, CO, CT, DE, FL, GA, ID, IL, IN, IA, KY, LA, ME, MD, MA, MI, NE, NH, NJ, NY, NC, ND, OH, OK, OR, PA, RI, SC, TN, TX, VA, WA, WY. The authors assume full responsibility for analyses and interpretation of these data. The authors thank the WHI investigators and staff for their dedication, and the study participants for making the program possible. A full listing of WHI investigators can be found at: <http://www.whi.org/researchers/Documents%20%20Write%20a%20Paper/WHI%20Investigator%20Short%20List.pdf>

### HELIC

This work was funded by the Wellcome Trust (WT098051) and the European Research Council (ERC-2011-StG 280559-SEPI). We thank the Mylopotamos villages residents for taking part. The MANOLIS study is dedicated to the memory of Manolis Giannakakis, 1978-2010.

## ORCADES

ORCADES was supported by the Chief Scientist Office of the Scottish Government (CZB/4/276, CZB/4/710), the Royal Society, the MRC Human Genetics Unit, Arthritis Research UK and the European Union framework program 6 EUROSPAN project (contract no. LSHG-CT-2006-018947). DNA extractions were performed at the Wellcome Trust Clinical Research Facility in Edinburgh. We would like to acknowledge the invaluable contributions of the research nurses in Orkney, the administrative team in Edinburgh and the people of Orkney.

## InCHIANTI

The InCHIANTI study was supported by contract funding from the U.S. National Institute on Aging (NIA), and the research was supported in part by the Intramural Research Program, NIA, and National Institute of Health (NIH).

## GoT2D

Funding for this study was provided by: The Academy of Finland (139635); Action on Hearing Loss (UK) (G51); The Ahokas Foundation; The Andrea and Charles Bronfman Philanthropies; The British Heart Foundation (SP/04/002); The Canadian Institutes of Health Research; The Estonian Government (IUT24-6, IUT20-60); The European Commission (ENGAGE: HEALTH-F4-2007-201413); The European Community's Seventh Framework Programme (FP7/2007-2013) (EpiMigrant, 279143); The European Regional Development Fund (3.2.0304.11-0312); The European Research Council (ADG20110310#293574); The European Union (EXGENESIS); The Finnish Diabetes Research Foundation; The Finnish Foundation for Cardiovascular Research; The Finnish Medical Society; The Folkhälsan Research Foundation (Finland); The Fonds de la Recherche en Santé du Québec (Canada); The Foundation for Life and Health in Finland; The German Federal Ministry of Education and Research (BMBF); The German Federal Ministry of Health (BMG); The German Center for Diabetes Research (DZD); Helmholtz Zentrum München (German Research Center for Environmental Health), which is supported by the German Federal Ministry of Education and Research (BMBF) and by the State of Bavaria; The Helsinki University Central Hospital Research Foundation; The KG Jebsen Foundation (Norway); The Knut och Alice Wallenberg Foundation (Sweden); The Medical Research Council (UK) (G0601261, G0601966, G0700931, G0900747); The Ministry of Science and Research of the State of North Rhine-Westphalia (MIWF NRW); The Munich Center of Health Sciences (MC-Health); The Närpes Health Care Foundation (Finland); The National Institute for Health Research (UK) (RP-PG-0407-10371); The National Institutes of Health (USA) (DK020595, DK062370, DK072193, DK073541, DK080140, DK085501, DK085526, DK085545, DK088389, DK092251, DK093757, DK098032, GM007753, HG005773, HHSN268201300046C, HHSN268201300047C, HHSN268201300048C, HHSN268201300049C, HHSN268201300050C, HL102830, MH090937, MH101820); The Nordic Center of Excellence in Disease Genetics; Novo Nordisk; The Ollqvist

Foundation (Finland); The Paavo Nurmi Foundation (Finland); The Pålssons Foundation (Sweden); The Perklén Foundation (Finland); The Research Council of Norway; The Signe and Ane Gyllenberg Foundation (Finland); The Sigrid Juselius Foundation (Finland); The Skåne Regional Health Authority (Sweden); The Swedish Cultural Foundation in Finland; The Swedish Diabetes Foundation (2012-1397, 2013-024); The Swedish Heart-Lung Foundation (20140422); The Swedish Research Council; The University of Bergen; The University of Tartu (SP1GVARENG); Uppsala University; The Wellcome Trust (UK) (064890, 083948, 084723, 085475, 086596, 090367, 090532, 092447, 095101, 095552, 098017, 098051, 098381); The Western Norway Regional Health Authority (Helse Vest)

### IBD

Inflammatory bowel disease case collections were supported by Crohn's and Colitis UK. We acknowledge support from the Department of Health via the NIHR comprehensive Biomedical Research Centre awards to Guy's and St Thomas' NHS Foundation Trust in partnership with King's College London and to Addenbrooke's Hospital, Cambridge in partnership with the University of Cambridge. The sequencing of the inflammatory bowel disease samples was co-funded by the Wellcome Trust [098051] and the Medical Research Council, UK [MR/J00314X/1]. YL, JCB, and CAA are supported by the Wellcome Trust [098051]. We thank and acknowledge all IBD patients who contributed samples to this study.

### Project MinE

Project MinE was supported by the ALS Foundation Netherlands. Research leading to these results has received funding from the European Community's Health Seventh Framework Programme (FP7/2007-2013). This study was supported by ZonMw under the frame of E-Rare-2, the ERA Net for Research on Rare Diseases (PYRAMID). This is an EU Joint Programme—Neurodegenerative Disease Research (JPND) project (STRENGTH, SOPHIA). The project is supported through the following funding organizations under the aegis of JPND: UK, Medical Research Council and Economic and Social Research Council; Ireland, Health Research Board; Netherlands, ZonMw; Italy, Ministry of Health and Ministry of Education, University and Research; France, L'Agence nationale pour la recherche. This project is supported by the Netherlands Organisation for Health Research and Development (Vici scheme to L.H. van den). We would like to thank people with ALS/MND and their families for their participation in this project.

### AMD

The AMD cohort was supported by the Intramural Research program of the National Eye Institute, National Institutes of Health (EY000546; contract HHS-N-260-2005-00007-C; ADB contract NO1-EY-5-0007). We would also like to acknowledge Rinki Ratnapriya, Linn Gieser, Mohammad Othman and John Heckenlively.

## MCTFR

Funding for this study was supported through grants from the National Institutes of Health DA037904, DA024417, DA036216, DA05147, AA09367, DA024417, HG007022, and HL117626.

## SISu and Kuusamo

The SISu and Kuusamo dataset comprise of selected study samples from the FINRISK and Health2000 (H2000) studies. FINRISK study has been primarily funded by budgetary funds of THL (National Institute for Health and Welfare) with important additional funding from the Academy of Finland (grant number 139635 for VS) and from the Finnish Foundation for Cardiovascular Research. The H2000 study was funded by the National Institute for Health and Welfare (THL), the Finnish Centre for Pensions (ETK), the Social Insurance Institution of Finland (KELA), the Local Government Pensions Institution (KEVA) and other organizations listed on the website of the survey (<http://www.terveys2000.fi>). Both studies are grateful for the THL DNA laboratory for its skillful work to produce the DNA samples used in this study. We thank the Sanger Institute sequencing facilities for whole genome sequencing of the Kuusamo subset. AP and SR are supported by the Academy of Finland (grant no. 251704, 286500, 293404 to AP, and 251217, 285380 to SR), Juselius Foundation, Finnish Foundation for Cardiovascular Research, NordForsk e-Science NIASC (grant no 62721) and Biocentrum Helsinki (to SR).

## INGI-VB

We thank all the participants to the project, the San Raffaele Hospital MDs who contributed to clinical data collection, prof. Clara Camaschella who coordinated the data collection, Corrado Masciullo and Massimiliano Cocca for the database informatics. The research was supported by funds from Compagnia di San Paolo, Torino, Italy; Fondazione Cariplo, Italy; Telethon Italy; Ministry of Health, Ricerca Finalizzata 2008 and 2011-2012 and Public Health Genomics Project 2010.

## UK10K

This study makes use of data generated by the UK10K Consortium, derived from samples from the ALSPAC and TwinsUK datasets. A full list of the investigators who contributed to the generation of the data is available from [www.UK10K.org](http://www.UK10K.org). Funding for UK10K was provided by the Wellcome Trust under award WT091310. NJT works in the Medical Research Council Integrative Epidemiology Unit (IEU) at the University of Bristol which is supported by the Medical Research Council (MC\_UU\_12013/3) and the University of Bristol. Nicole Soranzo's research is supported by the Wellcome

Trust (Grant Codes WT098051 and WT091310), the EU FP7 (EPIGENESYS Grant Code 257082 and BLUEPRINT Grant Code HEALTH-F5-2011-282510) and the National Institute for Health Research Blood and Transplant Research Unit (NIHR BTRU) in Donor Health and Genomics at the University of Cambridge in partnership with NHS Blood and Transplant (NHSBT). The views expressed are those of the author(s) and not necessarily those of the NHS, the NIHR, the Department of Health or NHSBT.

#### INGI FVG and Carlantino

Funding: European Regional Development Fund (INGI FVG and Carlantino), Telethon Foundation (GGP09037 to INGI FVG and Carlantino, P. Gasparini, M. Cocca), Fondo Trieste (2008 to INGI FVG and Carlantino, P. Gasparini), Regione FVG (L.26.2008 to INGI FVG and Carlantino, P. Gasparini, M. Cocca), Italian Ministry of Health (RC16/06, ART. 13 D.LGS 297/99 to INGI FVG and Carlantino, P. Gasparini, M. Cocca). We would like to thank the people of the Friuli Venezia Giulia Region and of Carlantino for the everlasting support.

#### Genomic Psychiatry Cohort

We wish to acknowledge all of the research participants in this cohort, as well as the following sources of support: U01 MH105641, R01 MH085548, R01MH104964.

#### HUNT

The Nord-Trøndelag Health Study (The HUNT Study) is a collaboration between the HUNT Research Centre (Faculty of Medicine, Norwegian University of Science and Technology NTNU), the Nord-Trøndelag County Council, the Central Norway Health Authority and the Norwegian Institute of Public Health. The HUNT-MI study is a collaboration between investigators from the HUNT study and the University of Michigan. Sequencing of the HUNT-MI sample was funded by HL109946. We thank the HUNT study participants for their contributions to scientific research. C.J.W. is supported by HL109946 and HL127564 from the National Heart, Lung and Blood Institute.

#### BRIDGES

This work was supported by R01 MH094145 to Michael Boehnke and Richard M. Myers and U01 MH105653 to Michael Boehnke. The collection and storage of cases and controls from the Centre for Addiction and Mental Health (CAMH) in Toronto and from the Institute of Psychiatry, Psychology and Neuroscience (IoPPN), King's College London in London, U.K. was supported by funding from GlaxoSmithKline, from the Canadian Institutes of Health Research to John B. Vincent, MOP-172013 (CAMH), and funding from the National Institute for Health Research (NIHR) Biomedical Research Centre at South London and Maudsley NHS Foundation Trust and King's College London (IoPPN). The views expressed are those of the author(s) and not necessarily those of the UK NHS, the NIHR or the UK Department of Health. Case and control collection was supported by Heinz C. Prechter Bipolar

Research Fund at the University of Michigan Depression Center to Melvin G. McInnis (Prechter). Data and biomaterials were collected for the Systematic Treatment Enhancement Program for Bipolar Disorder (STEP-BD), a multi-center, longitudinal project selected from responses to RFP #NIMH-98-DS-0001, "Treatment for Bipolar Disorder" which was led by Gary Sachs and coordinated by Massachusetts General Hospital in Boston, MA with support from 2N01 MH080001-001.

#### SHIP and SHIP-TREND

SHIP is part of the Community Medicine Research net of the University of Greifswald, Germany, which is funded by the Federal Ministry of Education and Research (grants no. 01ZZ9603, 01ZZ0103, and 01ZZ0403), the Ministry of Cultural Affairs as well as the Social Ministry of the Federal State of Mecklenburg-West Pomerania, and the network 'Greifswald Approach to Individualized Medicine (GANI\_MED)' funded by the Federal Ministry of Education and Research (grant 03IS2061A). Genome-wide data have been supported by the Federal Ministry of Education and Research (grant no. 03ZIK012) and a joint grant from Siemens Healthcare, Erlangen, Germany and the Federal State of Mecklenburg- West Pomerania. The University of Greifswald is a member of the Caché Campus program of the InterSystems GmbH.
